# Supplementary material
Source: publisher figshare collection journal article supplement (https://sage.figshare.com/ndownloader/files/22246974)
Supplement: Supplementary file 1 [file 22246974]

Online Appendix for **Political parties and social groups: New perspectives and data on group and policy appeals** (Alexander Horn, Anthony Kevins, Carsten Jensen, Kees van Kersbergen). OnlineFirst in [Party Politics](#) (2020).

*Online-Appendix 1: Condensed (12 page) version of the group synonyms, instruments, and aims*

| Groups (Level 1/mention)                                                                                                                                                                                                                                                                                                                                                                                                                                        | Level 2 (instrument)                                                                                                                                                                                                                                                                                                                                                                                                                                                                                                                                                                                                                                                                                                                                                                                                                                                                                                                                                                                                                                                                                                                                                                                                                                                                                                                                                                                             | Level 3 (aim)                                                                                                                                                                                                                                                                                                                                                                                                                                                                                                                                                                                                                                                                                                                                                                                                                                                                                                                                                                                                                                                                                                                                                                                                                                                                                                                                                                                                                                                                                             |
|-----------------------------------------------------------------------------------------------------------------------------------------------------------------------------------------------------------------------------------------------------------------------------------------------------------------------------------------------------------------------------------------------------------------------------------------------------------------|------------------------------------------------------------------------------------------------------------------------------------------------------------------------------------------------------------------------------------------------------------------------------------------------------------------------------------------------------------------------------------------------------------------------------------------------------------------------------------------------------------------------------------------------------------------------------------------------------------------------------------------------------------------------------------------------------------------------------------------------------------------------------------------------------------------------------------------------------------------------------------------------------------------------------------------------------------------------------------------------------------------------------------------------------------------------------------------------------------------------------------------------------------------------------------------------------------------------------------------------------------------------------------------------------------------------------------------------------------------------------------------------------------------|-----------------------------------------------------------------------------------------------------------------------------------------------------------------------------------------------------------------------------------------------------------------------------------------------------------------------------------------------------------------------------------------------------------------------------------------------------------------------------------------------------------------------------------------------------------------------------------------------------------------------------------------------------------------------------------------------------------------------------------------------------------------------------------------------------------------------------------------------------------------------------------------------------------------------------------------------------------------------------------------------------------------------------------------------------------------------------------------------------------------------------------------------------------------------------------------------------------------------------------------------------------------------------------------------------------------------------------------------------------------------------------------------------------------------------------------------------------------------------------------------------------|
| <b>All</b> <ul style="list-style-type: none"> <li>•Danish citizens</li> <li>•all social groups</li> <li>•everyone, regardless of educational background and age</li> <li>•all, regardless of economic and social background</li> <li>•citizens</li> <li>•none</li> <li>•all adults</li> <li>•all, independent of where you live</li> <li>•all, independent of income</li> <li>•all residents</li> <li>•all people, regardless of ability to function</li> </ul> | <ul style="list-style-type: none"> <li>•none</li> <li>•progressive taxation</li> <li>•education and work</li> <li>•higher deductions</li> <li>•possibility for education and work</li> <li>•taxes</li> <li>•demand to pay for support over tax</li> <li>•lower taxes</li> <li>•treatment guarantee</li> <li>•prevent diseases, tax deductions for health insurance</li> <li>•right to welfare</li> <li>•rights, life-long learning</li> <li>•free education</li> <li>•low deductions</li> <li>•increased capacity</li> <li>•freedom to choose between private and public welfare services</li> <li>•education through life, more rights, unions</li> <li>•welfare schemes must be designed so that it pays to work</li> <li>•increase health care supply at local level</li> <li>•remove queues</li> <li>•reduce private welfare offers</li> <li>•more freedom to every school and the teachers</li> <li>•courses in the labour market</li> <li>•right to work, duty to work and opportunities to prepare for new jobs</li> <li>•invest in education</li> <li>•education for adults</li> <li>•general insurance if unemployed</li> <li>•possible to choose a permanent doctor</li> <li>•inclusive care guarantee</li> <li>•increased number of places within adult education</li> <li>•individual influence</li> <li>•review obstacles that stand in the way of hiring</li> <li>•less steep tax scale</li> </ul> | <ul style="list-style-type: none"> <li>•good/better health care</li> <li>•exploit own possibilities to the maximum</li> <li>•higher deductions</li> <li>•equal possibilities &amp; solidarity</li> <li>•possibility to take the education they want</li> <li>•flexible labour market</li> <li>•life long education</li> <li>•(equal) access/right to education</li> <li>•good economy</li> <li>•receive public support</li> <li>•the life they want</li> <li>•responsible for own health</li> <li>•diverse society</li> <li>•qualified and competent labour</li> <li>•work for all</li> <li>•universal (equal )healthcare services/health care for all</li> <li>•freedom to run own life and develop individuality</li> <li>•labour market for all</li> <li>•small economic differences</li> <li>•health care when you need it</li> <li>•Increasing access to free legal assistance</li> <li>•full employment</li> <li>•welfare of high quality</li> <li>•right to equal education</li> <li>•life long learning</li> <li>•freedom to choose</li> <li>•more career paths for women</li> <li>•pay to be competent</li> <li>•education through life</li> <li>•most people with higher education</li> <li>•right to choose within welfare</li> <li>•Increase welfare and the right to choose within welfare</li> <li>•renew welfare</li> <li>•Sweden should be a competitive country in full employment</li> <li>•more jobs</li> <li>•full employment</li> <li>•create opportunities for education</li> </ul> |

|  |                                                                                                                                                                                                                                                                                                                                                                                                                                                                                                                                                                                                                                                                                                                                                                         |                                                                                                                                                                                                                                                                                                                                                                                                                                                                                                                                                                                                                                                                                                                                                                                                                                                                                                                                                                                                                                                                                                                                                                                                                                                                                                                                                                                                                                                                                                                                                                                                                                                                                                                                                                                                         |
|--|-------------------------------------------------------------------------------------------------------------------------------------------------------------------------------------------------------------------------------------------------------------------------------------------------------------------------------------------------------------------------------------------------------------------------------------------------------------------------------------------------------------------------------------------------------------------------------------------------------------------------------------------------------------------------------------------------------------------------------------------------------------------------|---------------------------------------------------------------------------------------------------------------------------------------------------------------------------------------------------------------------------------------------------------------------------------------------------------------------------------------------------------------------------------------------------------------------------------------------------------------------------------------------------------------------------------------------------------------------------------------------------------------------------------------------------------------------------------------------------------------------------------------------------------------------------------------------------------------------------------------------------------------------------------------------------------------------------------------------------------------------------------------------------------------------------------------------------------------------------------------------------------------------------------------------------------------------------------------------------------------------------------------------------------------------------------------------------------------------------------------------------------------------------------------------------------------------------------------------------------------------------------------------------------------------------------------------------------------------------------------------------------------------------------------------------------------------------------------------------------------------------------------------------------------------------------------------------------|
|  | <ul style="list-style-type: none"> <li>•public guarantee to welfare</li> <li>•adjusted welfare, when needed</li> <li>•encourage the use of new technology</li> <li>•reduce unemployment, more working hours</li> <li>•continue education</li> <li>•municipal tax equalization</li> <li>•equal conditions, their best interests taken into account in all decisions</li> <li>•cooperative companies, increased influence over own housing</li> <li>•social insurance if sickness, work injury, unemployment or parental leave</li> <li>•national cohesion</li> <li>•create proper care across the country</li> <li>•income-related sickness benefit, unemployment, parental leave, with a specified minimum level</li> <li>•more student places, free schools</li> </ul> | <p>and research</p> <ul style="list-style-type: none"> <li>•health care of high quality</li> <li>•more jobs in health care, education and care</li> <li>•receive welfare according to need</li> <li>•taxes should encourage people to work</li> <li>•freedom to choose in every day life</li> <li>•nation of knowledge of international caliber</li> <li>•pay to work</li> <li>•none</li> <li>•pay to take an education</li> <li>•income if you lose your job</li> <li>•welfare guarantee</li> <li>•safe and knowledge oriented school</li> <li>•education for the future</li> <li>•world's best welfare</li> <li>•labour market open for all</li> <li>•access to welfare services</li> <li>•roads, wifi and knowledge for everyone</li> <li>•public welfare of high quality</li> <li>•freedom within welfare</li> <li>•publicly financed and equal welfare</li> <li>•receive equivalent welfare treatment</li> <li>•good financial security</li> <li>•welfare that encourages work and self-support</li> <li>•social safety</li> <li>•right to good balance between work and time-off</li> <li>•meet future welfare challenges</li> <li>•everyone should have the right to influence their working hours</li> <li>•knowledge society</li> <li>•life-long education</li> <li>•freedom, equality and solidarity</li> <li>•welfare gives rights, but includes also demands</li> <li>•equal access to welfare</li> <li>•safe upbringing in accordance with the UN Convention</li> <li>•accommodation is a social right</li> <li>•Sweden should be a leading knowledge nation</li> <li>•pay to work, to take an education or be self-employed</li> <li>•individuals should be self-sufficient, as far as possible</li> <li>•right to a basic economic level</li> <li>•Social insurance should be</li> </ul> |
|--|-------------------------------------------------------------------------------------------------------------------------------------------------------------------------------------------------------------------------------------------------------------------------------------------------------------------------------------------------------------------------------------------------------------------------------------------------------------------------------------------------------------------------------------------------------------------------------------------------------------------------------------------------------------------------------------------------------------------------------------------------------------------------|---------------------------------------------------------------------------------------------------------------------------------------------------------------------------------------------------------------------------------------------------------------------------------------------------------------------------------------------------------------------------------------------------------------------------------------------------------------------------------------------------------------------------------------------------------------------------------------------------------------------------------------------------------------------------------------------------------------------------------------------------------------------------------------------------------------------------------------------------------------------------------------------------------------------------------------------------------------------------------------------------------------------------------------------------------------------------------------------------------------------------------------------------------------------------------------------------------------------------------------------------------------------------------------------------------------------------------------------------------------------------------------------------------------------------------------------------------------------------------------------------------------------------------------------------------------------------------------------------------------------------------------------------------------------------------------------------------------------------------------------------------------------------------------------------------|

|                                                                                                                                                                                                                                                                                                                                                                                                                                                                                                                                                                                                                                                                                                      |                                                                                                                                                                                                                                                                                                                                                                                                                                                                                                                                                                                                                                                                                                                                                                                                                                                                                                                                                                                                                                                                                                                       |                                                                                                                                                                                                                                                                                                                                                                                                                                                                                                                                                                                                                                                                                                                                                                                                                                                                                                                                                                                                                                                                                             |
|------------------------------------------------------------------------------------------------------------------------------------------------------------------------------------------------------------------------------------------------------------------------------------------------------------------------------------------------------------------------------------------------------------------------------------------------------------------------------------------------------------------------------------------------------------------------------------------------------------------------------------------------------------------------------------------------------|-----------------------------------------------------------------------------------------------------------------------------------------------------------------------------------------------------------------------------------------------------------------------------------------------------------------------------------------------------------------------------------------------------------------------------------------------------------------------------------------------------------------------------------------------------------------------------------------------------------------------------------------------------------------------------------------------------------------------------------------------------------------------------------------------------------------------------------------------------------------------------------------------------------------------------------------------------------------------------------------------------------------------------------------------------------------------------------------------------------------------|---------------------------------------------------------------------------------------------------------------------------------------------------------------------------------------------------------------------------------------------------------------------------------------------------------------------------------------------------------------------------------------------------------------------------------------------------------------------------------------------------------------------------------------------------------------------------------------------------------------------------------------------------------------------------------------------------------------------------------------------------------------------------------------------------------------------------------------------------------------------------------------------------------------------------------------------------------------------------------------------------------------------------------------------------------------------------------------------|
|                                                                                                                                                                                                                                                                                                                                                                                                                                                                                                                                                                                                                                                                                                      |                                                                                                                                                                                                                                                                                                                                                                                                                                                                                                                                                                                                                                                                                                                                                                                                                                                                                                                                                                                                                                                                                                                       | <ul style="list-style-type: none"> <li>universal and compulsory</li> <li>education for adults</li> <li>work against class divisions and social inequalities</li> <li>universal welfare state where those with more contribute more than those with less</li> <li>prevent regional imbalance</li> <li>tax system that ensure the future welfare state</li> <li>need, not ability to pay, shall be decisive</li> <li>social insurance should be based on individual rights and obligations</li> <li>large public sector</li> <li>right to knowledge and education</li> </ul>                                                                                                                                                                                                                                                                                                                                                                                                                                                                                                                  |
| <b>Elderly</b> <ul style="list-style-type: none"> <li>elderly over 75 years</li> <li>elderly over 62 years</li> <li>those without earning or pension through work</li> <li>pensioners older than 62</li> <li>elderly over 80 years</li> <li>elderly, pensioners</li> <li>pensioners</li> <li>sick elderly</li> <li>healthy elderly</li> <li>elderly in foreign countries</li> <li>members of national insurance</li> <li>elderly and others in need for care</li> <li>elderly and families with children</li> <li>elderly who wish to work after 67 years</li> <li>elderly living in nursing home</li> <li>elderly couple</li> <li>those in the last phase of life</li> <li>retired women</li> </ul> | <ul style="list-style-type: none"> <li>equal conditions</li> <li>flexible retirement age</li> <li>yearly dental control</li> <li>support</li> <li>none</li> <li>lower income tax</li> <li>housing, better health services</li> <li>right to housing, "care +"</li> <li>homecare</li> <li>right to welfare and care</li> <li>right to minimum pension</li> <li>supplementary pension</li> <li>day and night care services</li> <li>reform with strengthened nursing</li> <li>home visit</li> <li>work longer, profitable to combine work and pension</li> <li>activity</li> <li>reduce taxes</li> <li>publicly financed</li> <li>preventive treatment</li> <li>"omsorg +"</li> <li>nursing homes in foreign countries</li> <li>taxes, financial support</li> <li>housing, activities, subsidies to civil society organizations</li> <li>local and individual (healthcare) supply</li> <li>financial support to adjusted homes</li> <li>combine work with pension</li> <li>housing</li> <li>possibility to work longer, tax-reduction, guarantee to live together with partner</li> <li>reduce pension taxes</li> </ul> | <ul style="list-style-type: none"> <li>worthy life</li> <li>support</li> <li>none</li> <li>more elderly volunteering and participate in the labour market</li> <li>work longer</li> <li>keep their independence and self-respect</li> <li>live home as long as wanted</li> <li>get the help needed</li> <li>dignified retirement</li> <li>pay to work after 62</li> <li>better offer on follow-up</li> <li>Labour market for all</li> <li>economic safety, combine work and pension</li> <li>right/freedom to choose</li> <li>none</li> <li>financial security in old age, dignified old age</li> <li>better health, work longer</li> <li>live actively at home</li> <li>decrease loneliness among elderly</li> <li>active and healthy</li> <li>good old age</li> <li>coordinated welfare</li> <li>access to good welfare and health care</li> <li>always access to welfare</li> <li>better life</li> <li>increased life quality</li> <li>increased accessibility, improve the efficiency of emergency care</li> <li>right to dignified care</li> <li>view elderly as a resource</li> </ul> |

|                                                                                                                                                                                                                                                                                                                                                                                                                                                                                |                                                                                                                                                                                                                                                                                                                                                                                                                                                                                                                                                                                                                                                                                                                                                                                                                        |                                                                                                                                                                                                                                                                                                                                                                                                                                                                                                                                                                                                                                                     |
|--------------------------------------------------------------------------------------------------------------------------------------------------------------------------------------------------------------------------------------------------------------------------------------------------------------------------------------------------------------------------------------------------------------------------------------------------------------------------------|------------------------------------------------------------------------------------------------------------------------------------------------------------------------------------------------------------------------------------------------------------------------------------------------------------------------------------------------------------------------------------------------------------------------------------------------------------------------------------------------------------------------------------------------------------------------------------------------------------------------------------------------------------------------------------------------------------------------------------------------------------------------------------------------------------------------|-----------------------------------------------------------------------------------------------------------------------------------------------------------------------------------------------------------------------------------------------------------------------------------------------------------------------------------------------------------------------------------------------------------------------------------------------------------------------------------------------------------------------------------------------------------------------------------------------------------------------------------------------------|
|                                                                                                                                                                                                                                                                                                                                                                                                                                                                                | <ul style="list-style-type: none"> <li>•decrease taxes, right to free care at home</li> <li>•cars for home care</li> <li>•rights, guarantees</li> <li>•stay in the labour market</li> <li>•right to make demands on elderly care quality, clear and measurable quality goals in a national guarantee for the elderly</li> <li>•clearer rights, national guarantee</li> <li>•out and walk guarantee</li> <li>•choose food guarantee</li> <li>•possible to live together</li> <li>•financial support to build nursing home</li> <li>•more nursing homes, tax reductions</li> <li>•tax funded welfare</li> <li>•right to tax deduction for household and welfare services</li> <li>•welfare guarantee</li> <li>•meaningful and social activities</li> <li>•reform the pension system</li> <li>•inheritance tax</li> </ul> | <ul style="list-style-type: none"> <li>•individual adjusted welfare according to who you are, not according to age</li> <li>•increase the choice of accommodation</li> <li>•more stable care</li> <li>•safe old age</li> <li>•safe and worthy old age</li> <li>•worthy welfare</li> <li>•long lasting pension system</li> <li>•service-minded welfare for elderly</li> <li>•welfare with freedom to choose</li> <li>•increased power over own everyday-life</li> <li>•Sweden a good country for elderly</li> <li>•respect individual preferences</li> <li>•eliminate the unfair treatment of women</li> <li>•stronger social insurances"</li> </ul> |
| <b>(Labour) immigrants</b> <ul style="list-style-type: none"> <li>•immigrants with qualifications in high demand</li> <li>•immigrants, especially women</li> <li>•minorities</li> <li>•people without legal papers</li> <li>•foreign workers</li> <li>•newcomers and people with disabilities</li> <li>•Illegal immigrants</li> <li>•students just arriving in Sweden (immigrants)</li> <li>•Immigrant parents</li> <li>•minorities (Sami, Sweden Finns, Jews etc.)</li> </ul> | <ul style="list-style-type: none"> <li>•efficient processing of applications</li> <li>•get access to work</li> <li>•language training</li> <li>•interpreting service</li> <li>•right to medical care</li> <li>•quotas</li> <li>•none</li> <li>•abolish free medical and dental care</li> <li>•adjusted teaching, introduction classes</li> <li>•language training (Startsvenskan) while working</li> <li>•use own language when in contact with public services and welfare services</li> </ul>                                                                                                                                                                                                                                                                                                                        | <ul style="list-style-type: none"> <li>•contribute to society</li> <li>•open society</li> <li>•none</li> <li>•equality</li> <li>•better health</li> <li>•end discrimination</li> <li>•good wage- and working conditions</li> <li>•Sweden should be an open and attractive country for immigrants</li> <li>•more jobs</li> <li>•be self-sufficient</li> <li>•break down the ethnic division of labour</li> </ul>                                                                                                                                                                                                                                     |
| <b>The weak/the needy</b> <ul style="list-style-type: none"> <li>•the (particularly) vulnerable</li> <li>•the most vulnerable; mentally ill, the disabled, children and the homeless</li> <li>•mentally ill</li> <li>•vulnerable youth</li> <li>•handicapped</li> <li>•the disadvantaged</li> <li>•mentally ill, with serious diagnose</li> <li>•people with drug addiction</li> </ul>                                                                                         | <ul style="list-style-type: none"> <li>•personal responsible to get out of bad social situation</li> <li>•social benefits</li> <li>•support</li> <li>•none</li> <li>•include social and personal teaching</li> <li>•accessibility, follow up</li> <li>•access to health care, preventive care</li> </ul>                                                                                                                                                                                                                                                                                                                                                                                                                                                                                                               | <ul style="list-style-type: none"> <li>•access to health care</li> <li>•possible to contribute to society</li> <li>•equality between mental and physical diseases</li> <li>•support</li> <li>•reduce social differences</li> <li>•equal dental health care</li> <li>•equalize inequalities within dental field</li> <li>•strengthen mental health care</li> </ul>                                                                                                                                                                                                                                                                                   |

|                                                                                                                                                                                                                                                                                                                                                                                                                                                                                                                                                                                                                                                                                                                                                                                                                                                                                                                                                                                                                                                                                                                                                                                                                                                                                                                                                                                                                                                          |                                                                                                                                                                                                                                                                                                                                                                                                                                                                                                                                                                                                                                                                                                                                                                                                                                                                                                                                                                                                                                                                                                                                                                                                                                                                                                                                                                                                                                                                                                                                                                                                                                                                               |                                                                                                                                                                                                                                                                                                                                                                                                                                                                                                                                                                                                                                                                                                                                                                                                                                                                                                                                                                                                                                                                                                                                                                                                                                                                                                                                                                                                                                                                                                                                                                                                                                                                                                                 |
|----------------------------------------------------------------------------------------------------------------------------------------------------------------------------------------------------------------------------------------------------------------------------------------------------------------------------------------------------------------------------------------------------------------------------------------------------------------------------------------------------------------------------------------------------------------------------------------------------------------------------------------------------------------------------------------------------------------------------------------------------------------------------------------------------------------------------------------------------------------------------------------------------------------------------------------------------------------------------------------------------------------------------------------------------------------------------------------------------------------------------------------------------------------------------------------------------------------------------------------------------------------------------------------------------------------------------------------------------------------------------------------------------------------------------------------------------------|-------------------------------------------------------------------------------------------------------------------------------------------------------------------------------------------------------------------------------------------------------------------------------------------------------------------------------------------------------------------------------------------------------------------------------------------------------------------------------------------------------------------------------------------------------------------------------------------------------------------------------------------------------------------------------------------------------------------------------------------------------------------------------------------------------------------------------------------------------------------------------------------------------------------------------------------------------------------------------------------------------------------------------------------------------------------------------------------------------------------------------------------------------------------------------------------------------------------------------------------------------------------------------------------------------------------------------------------------------------------------------------------------------------------------------------------------------------------------------------------------------------------------------------------------------------------------------------------------------------------------------------------------------------------------------|-----------------------------------------------------------------------------------------------------------------------------------------------------------------------------------------------------------------------------------------------------------------------------------------------------------------------------------------------------------------------------------------------------------------------------------------------------------------------------------------------------------------------------------------------------------------------------------------------------------------------------------------------------------------------------------------------------------------------------------------------------------------------------------------------------------------------------------------------------------------------------------------------------------------------------------------------------------------------------------------------------------------------------------------------------------------------------------------------------------------------------------------------------------------------------------------------------------------------------------------------------------------------------------------------------------------------------------------------------------------------------------------------------------------------------------------------------------------------------------------------------------------------------------------------------------------------------------------------------------------------------------------------------------------------------------------------------------------|
| <ul style="list-style-type: none"> <li>•citizens with a health risk</li> <li>•people with eating disorders</li> <li>•mentally ill with low income</li> <li>•those with the greatest need for treatment</li> <li>•people with dementia</li> <li>•people in drug treatment, prison inmates and people with special needs</li> <li>•people in treatment with serious diseases</li> <li>•women without accrued rights</li> <li>•drug addicts</li> <li>•those with lifestyle diseases</li> <li>•people with poor ability to pay</li> <li>•poor people</li> <li>•those with serious diseases</li> <li>•poor people, including minorities and single parents</li> <li>•people with low income and short life expectancy</li> <li>•those not able to work</li> <li>•those without work</li> <li>•those who need it most</li> <li>•disabled people</li> <li>•people with reduced capacity to work</li> <li>•low- (and middle-income) groups</li> <li>•suicidal people</li> <li>•homeless</li> <li>•those without primary or secondary education, especially those who are unemployed</li> <li>•those who have a disadvantage</li> <li>•those in need for welfare</li> <li>•those who get into trouble as a result of illness, injury or unemployment</li> <li>•anyone in need</li> <li>•receivers of social benefits</li> <li>•those with less</li> <li>•those in need for care</li> <li>•people with low income</li> <li>•poor families with children</li> </ul> | <ul style="list-style-type: none"> <li>•publicly financed dental care</li> <li>•support</li> <li>•strengthen municipal housing, treatment and follow-up services</li> <li>•improved treatment</li> <li>•housing and work</li> <li>•monitoring and rehabilitation</li> <li>•frame management instead of price per unit</li> <li>•early diagnosis, help to live at home as long as wanted</li> <li>•increased public support</li> <li>•expand nursing benefit period to one year</li> <li>•increased financial support</li> <li>•higher priority of rehabilitation</li> <li>•strengthen school health care services</li> <li>•strengthen training and rehabilitation</li> <li>•decrease lifestyle-related health problems, increase physical activity</li> <li>•differentiated rates within health care</li> <li>•payments replaced by services and initiatives</li> <li>•consistent sick leave practice</li> <li>•job training should be a right for all without job, keep deductible of public services low</li> <li>•flexible arrangements, full payment if sick</li> <li>•prevention</li> <li>•rights</li> <li>•offer more care</li> <li>•quotas</li> <li>•financial support, education</li> <li>•pension</li> <li>•maximum 30 days wait for health help</li> <li>•dental care</li> <li>•welfare benefits paid as wage subsidies</li> <li>•right to assistance at working place</li> <li>•wage subsidies for an unspecified period</li> <li>•tax reduction</li> <li>•all the sick shall have the right to an individual assessment and the right to work according to their ability</li> <li>•more research and national guidance</li> <li>•employment guarantee</li> </ul> | <ul style="list-style-type: none"> <li>•an integrated health care supply for drug addicts</li> <li>•profitability should not be governing</li> <li>•develop and strengthen care for dementia</li> <li>•focus on individual</li> <li>•better coordination</li> <li>•social equality within health care</li> <li>•none</li> <li>•reduce sick leave</li> <li>•end poverty</li> <li>•back to work</li> <li>•a pension sufficient to live on, reduce economic differences</li> <li>•good health for life</li> <li>•good teeth</li> <li>•labour market for all</li> <li>•participate in labour market</li> <li>•pay to work</li> <li>•the common welfare shall be paid jointly but be better adapted to people's different needs and desires</li> <li>•better insurance</li> <li>•open labour market</li> <li>•better care</li> <li>•equality</li> <li>•labour market should have room for all</li> <li>•end discrimination</li> <li>•freedom to choose</li> <li>•participate in the labour market</li> <li>•no one should have to be homeless</li> <li>•worthy welfare</li> <li>•possible to live on wage</li> <li>•society with full access</li> <li>•good opportunities to upgrade skills throughout working lives</li> <li>•better opportunities</li> <li>•pay to make savings</li> <li>•better opportunities</li> <li>•economic safety of sick</li> <li>•welfare adjusted after patients need</li> <li>•equal treatment for both physical and mental illnesses</li> <li>•social welfare should provide security</li> <li>•support</li> <li>•social benefits</li> <li>•social benefits are not permanent</li> <li>•freedom to express point of view</li> <li>•fair taxes</li> <li>•reduce inequalities</li> </ul> |
|----------------------------------------------------------------------------------------------------------------------------------------------------------------------------------------------------------------------------------------------------------------------------------------------------------------------------------------------------------------------------------------------------------------------------------------------------------------------------------------------------------------------------------------------------------------------------------------------------------------------------------------------------------------------------------------------------------------------------------------------------------------------------------------------------------------------------------------------------------------------------------------------------------------------------------------------------------------------------------------------------------------------------------------------------------------------------------------------------------------------------------------------------------------------------------------------------------------------------------------------------------------------------------------------------------------------------------------------------------------------------------------------------------------------------------------------------------|-------------------------------------------------------------------------------------------------------------------------------------------------------------------------------------------------------------------------------------------------------------------------------------------------------------------------------------------------------------------------------------------------------------------------------------------------------------------------------------------------------------------------------------------------------------------------------------------------------------------------------------------------------------------------------------------------------------------------------------------------------------------------------------------------------------------------------------------------------------------------------------------------------------------------------------------------------------------------------------------------------------------------------------------------------------------------------------------------------------------------------------------------------------------------------------------------------------------------------------------------------------------------------------------------------------------------------------------------------------------------------------------------------------------------------------------------------------------------------------------------------------------------------------------------------------------------------------------------------------------------------------------------------------------------------|-----------------------------------------------------------------------------------------------------------------------------------------------------------------------------------------------------------------------------------------------------------------------------------------------------------------------------------------------------------------------------------------------------------------------------------------------------------------------------------------------------------------------------------------------------------------------------------------------------------------------------------------------------------------------------------------------------------------------------------------------------------------------------------------------------------------------------------------------------------------------------------------------------------------------------------------------------------------------------------------------------------------------------------------------------------------------------------------------------------------------------------------------------------------------------------------------------------------------------------------------------------------------------------------------------------------------------------------------------------------------------------------------------------------------------------------------------------------------------------------------------------------------------------------------------------------------------------------------------------------------------------------------------------------------------------------------------------------|

|                                                                                                                                                                                                                                                                                                                                                                                                                                                                                                                                                          |                                                                                                                                                                                                                                                                                                                                                                                                                                                                                                                                                                                                                                                                                                                                                                                                                                                                                                                                   |                                                                                                                                                                                                                                                                                                                                                                                                                                                                                                                                                                                                                                                                                                                              |
|----------------------------------------------------------------------------------------------------------------------------------------------------------------------------------------------------------------------------------------------------------------------------------------------------------------------------------------------------------------------------------------------------------------------------------------------------------------------------------------------------------------------------------------------------------|-----------------------------------------------------------------------------------------------------------------------------------------------------------------------------------------------------------------------------------------------------------------------------------------------------------------------------------------------------------------------------------------------------------------------------------------------------------------------------------------------------------------------------------------------------------------------------------------------------------------------------------------------------------------------------------------------------------------------------------------------------------------------------------------------------------------------------------------------------------------------------------------------------------------------------------|------------------------------------------------------------------------------------------------------------------------------------------------------------------------------------------------------------------------------------------------------------------------------------------------------------------------------------------------------------------------------------------------------------------------------------------------------------------------------------------------------------------------------------------------------------------------------------------------------------------------------------------------------------------------------------------------------------------------------|
|                                                                                                                                                                                                                                                                                                                                                                                                                                                                                                                                                          | <ul style="list-style-type: none"> <li>•civil society</li> <li>•less tax on work</li> <li>•influence over own life</li> <li>•right to finish school whenever</li> <li>•welfare that equalizes life chances</li> <li>•redistributive tools</li> <li>•benefits should be linked to rehabilitation to facilitate return to work</li> <li>•right to single room</li> <li>•treatment of mental illness be covered by the public welfare</li> <li>•offer meaningful jobs</li> <li>•activity demands, help to self-help, for example by offering training or rehabilitation</li> <li>•none</li> <li>•redistribution</li> <li>•tax level remains unchanged</li> <li>•publicly financed welfare</li> <li>•involve civil society</li> <li>•economic support for dental care</li> <li>•financial support</li> <li>•economic support</li> <li>•adjusted tax level</li> <li>•private and public providers will work on equal terms"</li> </ul> | <ul style="list-style-type: none"> <li>•good public welfare</li> <li>•combating poverty among children</li> <li>•fewer geographical and social differences</li> <li>•freedom to choose welfare</li> </ul>                                                                                                                                                                                                                                                                                                                                                                                                                                                                                                                    |
| <b>Families</b> <ul style="list-style-type: none"> <li>•next of kin</li> <li>•families with income generating work</li> <li>•families with children</li> <li>•those who care for family members</li> <li>•families where one parent is at home with children under two 2 years</li> <li>•parents with adopted children</li> <li>•families with low income</li> <li>•families, students with children and single parents</li> <li>•families with children and elderly over 80 years</li> <li>•families of single parents and same-sex couples"</li> </ul> | <ul style="list-style-type: none"> <li>•none</li> <li>•freedom organise family life, lower taxes</li> <li>•no tax on heritage</li> <li>•balance between work and family</li> <li>•affordable day care</li> <li>•10 days leave for caring for relatives</li> <li>•specific rights for fathers</li> <li>•welfare, support, possible to share maternity leave between parents, kontantstøtte</li> <li>•lower taxes</li> <li>•get welfare rights by being home with children</li> <li>•freedom to choose when to start and what school to stats at</li> <li>• free childcare, guaranteed childcare</li> <li>•care pay</li> <li>•kontantstøtte</li> <li>•increased financial support</li> <li>•financial support</li> <li>•freedom to choose, economic support</li> </ul>                                                                                                                                                              | <ul style="list-style-type: none"> <li>•best opportunities</li> <li>•safety</li> <li>•possible to inherit from family</li> <li>•good framework for family life</li> <li>•full day care coverage</li> <li>•none</li> <li>•freedom of choice</li> <li>•more time home</li> <li>•freedom to choose/be home with children</li> <li>•freedom to choose the best education</li> <li>•good childcare offer</li> <li>•stronger family institution</li> <li>•freedom to choose, economic and social safety</li> <li>•less difference between families with children and others</li> <li>•kindergartens of high quality</li> <li>•easier everyday life</li> <li>•freedom to choose the solutions that suits the family best</li> </ul> |

|                                                                                                                                                                                                                                                                                                                                                    |                                                                                                                                                                                                                                                                                                                                                                                                                                                                                                                                                                                                                                                                                                                                                                                                                                                                                                                                                                                                                                                                                                                                                                                                                            |                                                                                                                                                                                                                                                                                                                                                                                                                                                                                                                                                                                                                                                                                                                                                                                                                                                                                                                                                                                                                                                                                                                                      |
|----------------------------------------------------------------------------------------------------------------------------------------------------------------------------------------------------------------------------------------------------------------------------------------------------------------------------------------------------|----------------------------------------------------------------------------------------------------------------------------------------------------------------------------------------------------------------------------------------------------------------------------------------------------------------------------------------------------------------------------------------------------------------------------------------------------------------------------------------------------------------------------------------------------------------------------------------------------------------------------------------------------------------------------------------------------------------------------------------------------------------------------------------------------------------------------------------------------------------------------------------------------------------------------------------------------------------------------------------------------------------------------------------------------------------------------------------------------------------------------------------------------------------------------------------------------------------------------|--------------------------------------------------------------------------------------------------------------------------------------------------------------------------------------------------------------------------------------------------------------------------------------------------------------------------------------------------------------------------------------------------------------------------------------------------------------------------------------------------------------------------------------------------------------------------------------------------------------------------------------------------------------------------------------------------------------------------------------------------------------------------------------------------------------------------------------------------------------------------------------------------------------------------------------------------------------------------------------------------------------------------------------------------------------------------------------------------------------------------------------|
|                                                                                                                                                                                                                                                                                                                                                    | <ul style="list-style-type: none"> <li>•kindergartens, SFO</li> <li>•equal financial support to public and private kindergartens</li> <li>•tax deduction for each child</li> <li>•decrease taxes on household services</li> </ul>                                                                                                                                                                                                                                                                                                                                                                                                                                                                                                                                                                                                                                                                                                                                                                                                                                                                                                                                                                                          |                                                                                                                                                                                                                                                                                                                                                                                                                                                                                                                                                                                                                                                                                                                                                                                                                                                                                                                                                                                                                                                                                                                                      |
| <b>Students</b> <ul style="list-style-type: none"> <li>•those who do not finish high school</li> <li>•students with children</li> <li>•students between 15 and 20 years, who have to live away from home to finish high school</li> <li>•college students</li> <li>•students with difficulties to learn</li> <li>•students and children</li> </ul> | <ul style="list-style-type: none"> <li>•include individual skills</li> <li>•education tailored for the individual</li> <li>•free choice between public or private</li> <li>•equal access to education</li> <li>•increased focus on well-being</li> <li>•One hour free SFO of physical activity every day for the first four years, follow-up as early as possible</li> <li>•scholarship</li> <li>•help with homework, more hours</li> <li>•follow-up</li> <li>•adjusted teaching</li> <li>•increased financial support</li> <li>•(financial) support</li> <li>•scholarships to students who graduate earlier</li> <li>•strengthen school health care services</li> <li>•educate more teachers</li> <li>•Individuality</li> <li>•students' home, financial support</li> <li>•easier to hire as student helpers</li> <li>•students with rights; students should have influence, and ensured greater legal protection</li> <li>•more teachers</li> <li>•none</li> <li>•clarification preschool curriculum</li> <li>•more school nurses, school doctors</li> <li>•adjusted help</li> <li>•focus on quality</li> <li>•Better school food</li> <li>•right to influence own work</li> <li>•internships while studying"</li> </ul> | <ul style="list-style-type: none"> <li>•education of high quality</li> <li>•freedom to choose education and place</li> <li>•high academic standard</li> <li>•develop skills</li> <li>•allow and include personal skills</li> <li>•personal development</li> <li>•increase student welfare</li> <li>•best schools in the world, better schools</li> <li>•more students finishing high school</li> <li>•good starting point at school for all</li> <li>•improve higher education</li> <li>•finish school within fixed time</li> <li>•reward hard working students</li> <li>•easier to parent while studying</li> <li>•equal opportunities for all</li> <li>•world class education</li> <li>•better financial situation</li> <li>•pay off to have higher education</li> <li>•work while studying</li> <li>•a school where all talents are developed</li> <li>•better results in school</li> <li>•opportunity to succeed</li> <li>•clear content of knowledge</li> <li>•better health</li> <li>•none</li> <li>•college in world class</li> <li>•same (equal) rights as adults</li> <li>•education be designed to lead to job"</li> </ul> |
| <b>Parents (as workers)</b> <ul style="list-style-type: none"> <li>•families who work</li> <li>•parents with small children</li> <li>•fathers</li> <li>•parents</li> <li>•parents with less than 24 months between pregnancies</li> <li>•single parents with more than one child</li> </ul>                                                        | <ul style="list-style-type: none"> <li>•flexible work hours</li> <li>•flexible maternity leave</li> <li>•discontinue kontantstøtte, extend parental leave to 48 weeks</li> <li>•strengthen leave rights</li> <li>•flexible maternity leave</li> <li>•more maternity leave with more pregnancies, "sibling-bonus"</li> </ul>                                                                                                                                                                                                                                                                                                                                                                                                                                                                                                                                                                                                                                                                                                                                                                                                                                                                                                | <ul style="list-style-type: none"> <li>•be with their children</li> <li>•freedom of choice</li> <li>•combine family and work</li> <li>•good conditions for children</li> <li>•combine family and work</li> <li>•easier for parents</li> <li>•flexible kindergarten, adjusted to the families</li> </ul>                                                                                                                                                                                                                                                                                                                                                                                                                                                                                                                                                                                                                                                                                                                                                                                                                              |

|                                                                                                                                                                                                                                                                                                        |                                                                                                                                                                                                                                                                                                                                                                                                                                                                                                                                                                                                                                                                                                                                                                                                                                                                                                                                                                                                                                                                                                                                                                                                                                                                                                                                                                                                                                                                           |                                                                                                                                                                                                                                                                                                                                                                                                                                                                                                                                                                                                                                                                                                                                                                                                                                                                                                                               |
|--------------------------------------------------------------------------------------------------------------------------------------------------------------------------------------------------------------------------------------------------------------------------------------------------------|---------------------------------------------------------------------------------------------------------------------------------------------------------------------------------------------------------------------------------------------------------------------------------------------------------------------------------------------------------------------------------------------------------------------------------------------------------------------------------------------------------------------------------------------------------------------------------------------------------------------------------------------------------------------------------------------------------------------------------------------------------------------------------------------------------------------------------------------------------------------------------------------------------------------------------------------------------------------------------------------------------------------------------------------------------------------------------------------------------------------------------------------------------------------------------------------------------------------------------------------------------------------------------------------------------------------------------------------------------------------------------------------------------------------------------------------------------------------------|-------------------------------------------------------------------------------------------------------------------------------------------------------------------------------------------------------------------------------------------------------------------------------------------------------------------------------------------------------------------------------------------------------------------------------------------------------------------------------------------------------------------------------------------------------------------------------------------------------------------------------------------------------------------------------------------------------------------------------------------------------------------------------------------------------------------------------------------------------------------------------------------------------------------------------|
| <ul style="list-style-type: none"> <li>•students and people not in work, when becoming pregnant and starting a family</li> <li>•breastfeeding women</li> <li>•mothers and fathers</li> <li>•single parents</li> <li>•parents with disabled children</li> <li>•women</li> <li>•men and women</li> </ul> | <ul style="list-style-type: none"> <li>•increase deduction for childcare</li> <li>•increase kontantstøtte</li> <li>•kindergarten for all</li> <li>•rights</li> <li>•economic support</li> <li>•right to social child benefit, no tax on social child benefit</li> <li>•father right to at least 1/3 of maternity leave</li> <li>•expand economic support</li> <li>•replace transitional benefit for single parents with activity-oriented initiatives and day care after child is one year</li> <li>•equal distribution of parental leave</li> <li>•financial support</li> <li>•earmarked leave for fathers</li> <li>•SFO is voluntary, free help with homework</li> <li>•course for parents, statutory right to go down to 80% position, expanded and more flexible maternity leave</li> <li>•maximum payment on kindergarten, adjusted working hours</li> <li>•none</li> <li>•financial support to mothers</li> <li>•kindergarten, public and private</li> <li>•develop and facilitate gender equality bonuses</li> <li>•none</li> <li>•right to pre-school, also at evenings and in the weekend</li> <li>•equal share of paternal leave between parents</li> <li>•possible to combine work and family</li> <li>•high ceiling for income protection</li> <li>•child benefits should be tax free and equal for all</li> <li>•a large variety of types of child care, including opportunities for parents to look after their children during the early years"</li> </ul> | <ul style="list-style-type: none"> <li>•spend more time with their children</li> <li>•complete pregnancy</li> <li>•paid breastfeeding breaks</li> <li>•equal conditions for upbringing</li> <li>•freedom to choose</li> <li>•both parents can work and look after the child</li> <li>•none</li> <li>•child friendly society</li> <li>•labour market that takes family life into account</li> <li>•gender equality</li> <li>•more welfare entrepreneurs and increased freedom for women</li> <li>•possibility to make career (women)</li> <li>•shared responsibility for children and home</li> <li>•tax,- family- and financial policy should promote work</li> <li>•parent-insurance adjusted to families and children</li> <li>•right to self-sufficiency and stimulating career</li> <li>•possible to stay home</li> <li>•good opportunities to combine work and family</li> <li>•more freedom and independence</li> </ul> |
| <b>The strong and healthy</b> <ul style="list-style-type: none"> <li>•those with high income</li> <li>•those with highest income</li> <li>•those with high income and who own much</li> </ul>                                                                                                          | <ul style="list-style-type: none"> <li>•stay in the labour market</li> <li>•capital tax</li> <li>•higher taxes, contribution by ability</li> <li>•increase tax level</li> <li>•pay more to the community</li> </ul>                                                                                                                                                                                                                                                                                                                                                                                                                                                                                                                                                                                                                                                                                                                                                                                                                                                                                                                                                                                                                                                                                                                                                                                                                                                       | <ul style="list-style-type: none"> <li>•provide for themselves</li> <li>•fair taxes</li> <li>•reduce economic differences</li> <li>•high level of future welfare services</li> <li>•fair tax-system</li> </ul>                                                                                                                                                                                                                                                                                                                                                                                                                                                                                                                                                                                                                                                                                                                |
| <b>Youth</b>                                                                                                                                                                                                                                                                                           |                                                                                                                                                                                                                                                                                                                                                                                                                                                                                                                                                                                                                                                                                                                                                                                                                                                                                                                                                                                                                                                                                                                                                                                                                                                                                                                                                                                                                                                                           |                                                                                                                                                                                                                                                                                                                                                                                                                                                                                                                                                                                                                                                                                                                                                                                                                                                                                                                               |



|                                                                                                                                                                                                                                                                                                                                                                                                                                                                                                                                                                                                                                                                                                                                                                                                                                                                                                                                                                                                                                                                                                           |                                                                                                                                                                                                                                                                                                                                                                                                                                                                                                                                                                                                                                                                                                                                                                                                                                                                                                                                                                                                                                                                                                                                                                                                                                                                                                                                                                                                                                                                                                                                     |                                                                                                                                                                                                                                                                                                                                                                                                                                                                                                                                                                                                                                                                                                                                                                                                                                                                                                                                                                                                                                                                                                                                                                                                                                                                                                                                                                                                                                  |
|-----------------------------------------------------------------------------------------------------------------------------------------------------------------------------------------------------------------------------------------------------------------------------------------------------------------------------------------------------------------------------------------------------------------------------------------------------------------------------------------------------------------------------------------------------------------------------------------------------------------------------------------------------------------------------------------------------------------------------------------------------------------------------------------------------------------------------------------------------------------------------------------------------------------------------------------------------------------------------------------------------------------------------------------------------------------------------------------------------------|-------------------------------------------------------------------------------------------------------------------------------------------------------------------------------------------------------------------------------------------------------------------------------------------------------------------------------------------------------------------------------------------------------------------------------------------------------------------------------------------------------------------------------------------------------------------------------------------------------------------------------------------------------------------------------------------------------------------------------------------------------------------------------------------------------------------------------------------------------------------------------------------------------------------------------------------------------------------------------------------------------------------------------------------------------------------------------------------------------------------------------------------------------------------------------------------------------------------------------------------------------------------------------------------------------------------------------------------------------------------------------------------------------------------------------------------------------------------------------------------------------------------------------------|----------------------------------------------------------------------------------------------------------------------------------------------------------------------------------------------------------------------------------------------------------------------------------------------------------------------------------------------------------------------------------------------------------------------------------------------------------------------------------------------------------------------------------------------------------------------------------------------------------------------------------------------------------------------------------------------------------------------------------------------------------------------------------------------------------------------------------------------------------------------------------------------------------------------------------------------------------------------------------------------------------------------------------------------------------------------------------------------------------------------------------------------------------------------------------------------------------------------------------------------------------------------------------------------------------------------------------------------------------------------------------------------------------------------------------|
| <ul style="list-style-type: none"> <li>• Youth, independent of economic background</li> <li>• children</li> <li>• children in school</li> <li>• children in areas with minorities</li> <li>• children in families on social welfare</li> <li>• youth up to 20 years</li> <li>• children and youth under 18 years</li> <li>• children and youth</li> <li>• youth up to 23 years</li> <li>• people/young under 21 years</li> <li>• children and young people</li> <li>• children and women</li> <li>• young people and those without work</li> <li>• young unemployed</li> <li>• young people under 25 years</li> <li>• trainees</li> <li>• parents with atypical working hours</li> <li>• children, wherever they live</li> <li>• exposed children, or children from families without higher education</li> <li>• boys</li> <li>• disabled children and youth</li> <li>• students who lack high school eligibility</li> <li>• young people and the foreign born</li> <li>• parents and children</li> <li>• all children regardless of family background, place of residence and parents' income</li> </ul> | <ul style="list-style-type: none"> <li>• economic support to education</li> <li>• help with homework</li> <li>• more teachers, more hours</li> <li>• income-differentiated payments for SFO</li> <li>• summer school</li> <li>• right to activity welfare</li> <li>• free consultation at the doctor</li> <li>• health stations for youth, also in school</li> <li>• improve health centres at schools</li> <li>• free health care</li> <li>• free dental care</li> <li>• adjusted education system</li> <li>• minimum support from National Insurance Scheme</li> <li>• local health stations, home visits for newly born</li> <li>• financial support</li> <li>• innovation, open labour market</li> <li>• easier to hire young people</li> <li>• tax-reductions to those who hire young unemployed</li> <li>• create 44000 more places in adult education, competence insurance</li> <li>• none</li> <li>• apprenticeship</li> <li>• practical experience</li> <li>• fast help to activity</li> <li>• new form of employment for apprentices</li> <li>• night open kindergartens</li> <li>• right to support, freedom to choose, increased responsibility</li> <li>• offered place in kindergarten from the age of one year</li> <li>• more resources to schools</li> <li>• entitled to support regardless of individual circumstances</li> <li>• optional adjusted teaching, safe school</li> <li>• flexible duration of studies</li> <li>• training and lower thresholds, for example through subsidized employment</li> </ul> | <ul style="list-style-type: none"> <li>• education for all</li> <li>• equal possibility to good and free education</li> <li>• an inclusive school</li> <li>• SFO being integrated in the school</li> <li>• none</li> <li>• education system where one can develop one's skills throughout life</li> <li>• contribute to a good start for children</li> <li>• better health</li> <li>• fair distribution of welfare to parents</li> <li>• more jobs</li> <li>• fight youth unemployment</li> <li>• Sweden should have lowest unemployment among youth</li> <li>• flying start for young people</li> <li>• half of each cohort should have commenced higher education before the age of 25</li> <li>• best education in school</li> <li>• reduce youth unemployment</li> <li>• more trainee positions</li> <li>• a school with the student at the centre</li> <li>• good schools</li> <li>• good education, wherever you live</li> <li>• freedom to choose education</li> <li>• most kids have some reading skills when leaving kindergarten</li> <li>• improve knowledge-level</li> <li>• accessible school</li> <li>• more inclusive labour market</li> <li>• safe living conditions</li> <li>• Swedish childcare should always be based on the needs of children</li> <li>• children's best interests must be taken into account in all situations in family policies</li> <li>• a restoration of the welfare state"</li> </ul> |
| <b>Workers</b> <ul style="list-style-type: none"> <li>• member of labour unions</li> <li>• employees</li> <li>• people with seasonal work</li> <li>• workers within healthcare</li> <li>• public employees</li> <li>• part-time workers</li> <li>• union workers</li> </ul>                                                                                                                                                                                                                                                                                                                                                                                                                                                                                                                                                                                                                                                                                                                                                                                                                               | <ul style="list-style-type: none"> <li>• wages reflect efforts</li> <li>• shorter working time</li> <li>• strong unions</li> <li>• save working hours</li> <li>• employment system must take seasonal work into account</li> <li>• rights</li> </ul>                                                                                                                                                                                                                                                                                                                                                                                                                                                                                                                                                                                                                                                                                                                                                                                                                                                                                                                                                                                                                                                                                                                                                                                                                                                                                | <ul style="list-style-type: none"> <li>• as many as possible in work</li> <li>• increased quality of life</li> <li>• better wages and life conditions</li> <li>• flexible working hours</li> <li>• increase job satisfaction</li> <li>• good working environment</li> <li>• work against social dumping</li> </ul>                                                                                                                                                                                                                                                                                                                                                                                                                                                                                                                                                                                                                                                                                                                                                                                                                                                                                                                                                                                                                                                                                                               |

|                                                                                                                                                                                                                                                                                                                                                                                       |                                                                                                                                                                                                                                                                                                                                                                                                                                                                                                                                                                                                                                                                                                                                                                                                                                                                                                                                                                                                                                                                                                                                                                                                                                                                                                                                                                                                                                                                                                                                                                                                                                                                                                                                                |                                                                                                                                                                                                                                                                                                                                                                                                                                                                                                                                                                                                                                                                                                                                                                                                                                                                                                                                                                                                                                                                                                         |
|---------------------------------------------------------------------------------------------------------------------------------------------------------------------------------------------------------------------------------------------------------------------------------------------------------------------------------------------------------------------------------------|------------------------------------------------------------------------------------------------------------------------------------------------------------------------------------------------------------------------------------------------------------------------------------------------------------------------------------------------------------------------------------------------------------------------------------------------------------------------------------------------------------------------------------------------------------------------------------------------------------------------------------------------------------------------------------------------------------------------------------------------------------------------------------------------------------------------------------------------------------------------------------------------------------------------------------------------------------------------------------------------------------------------------------------------------------------------------------------------------------------------------------------------------------------------------------------------------------------------------------------------------------------------------------------------------------------------------------------------------------------------------------------------------------------------------------------------------------------------------------------------------------------------------------------------------------------------------------------------------------------------------------------------------------------------------------------------------------------------------------------------|---------------------------------------------------------------------------------------------------------------------------------------------------------------------------------------------------------------------------------------------------------------------------------------------------------------------------------------------------------------------------------------------------------------------------------------------------------------------------------------------------------------------------------------------------------------------------------------------------------------------------------------------------------------------------------------------------------------------------------------------------------------------------------------------------------------------------------------------------------------------------------------------------------------------------------------------------------------------------------------------------------------------------------------------------------------------------------------------------------|
| <ul style="list-style-type: none"> <li>•men and women</li> <li>•workers with children, sick or elderly family members</li> <li>•skilled workers</li> <li>•women</li> <li>•unionized and non- unionized</li> <li>•workers under 26 years</li> <li>•public workers</li> <li>•workers within social welfare</li> <li>•those without formal education or outside labour market</li> </ul> | <ul style="list-style-type: none"> <li>•(cooperation with) unions</li> <li>•taxes</li> <li>•rights</li> <li>•priority to part-time workers when a new position becomes available</li> <li>•union dues are tax deductible</li> <li>•reform: six hour work day</li> <li>•salary supplement for female-dominated professions</li> <li>•adjusted working hours</li> <li>•right to full-time work</li> <li>•opportunities to move forward with relevant higher education, increase the number of apprenticeships</li> <li>•equalizing non-unionized with unionized, flexible employment agreements, easier with part-time, flexibility</li> <li>•temporary workers regarded as permanent employees after two years</li> <li>•paid leave if parents are sick</li> <li>•productivity also rewarded through shorter working hours and vacation</li> <li>•tax reduction on income</li> <li>•skill development</li> <li>•full-time job is a right</li> <li>•keep the low tax</li> <li>•permanent discount on corporate labour tax for the first ten employees</li> <li>•increased support to research on women illnesses</li> <li>•unions and the right to strike</li> <li>•increased development within work</li> <li>•shorter working hours, with the same salary</li> <li>•increased control for workers</li> <li>•possible to lose wage and work hours to develop skills on a part-time basis</li> <li>•more jobs that do not require formal knowledge or experience</li> <li>•time-limited (labour) substitute the first time and then a gradual slowdown</li> <li>•expanded adjustment insurance</li> <li>•strengthening employment law</li> <li>•strengthen the right to strike, and the employment law. Union organization and fight"</li> </ul> | <ul style="list-style-type: none"> <li>•abolish part-time work in public sector</li> <li>•pay to work</li> <li>•ensure the wellbeing of public employees</li> <li>•right to full-time work</li> <li>•more power to unions</li> <li>•shorter working days</li> <li>•equal pay for same job</li> <li>•more shall finish school</li> <li>•freedom</li> <li>•right to full-time job</li> <li>•strengthen voluntary care</li> <li>•family friendly labour market</li> <li>•work and efforts should be encouraged</li> <li>•job safety</li> <li>•decrease the number of insecure jobs</li> <li>•no to tax on youth</li> <li>•more jobs and secure employees</li> <li>•equality and safety</li> <li>•better conditions</li> <li>•labour market that makes people grow</li> <li>•lifelong learning</li> <li>•get jobs</li> <li>•universal and public social security insurance</li> <li>•combining security and labour market mobility</li> <li>•equal pay for equal work</li> <li>•Improve workers' position in relation to capital owners</li> <li>•eliminate gender segregation on labour market"</li> </ul> |
| <b>People on social benefits</b>                                                                                                                                                                                                                                                                                                                                                      |                                                                                                                                                                                                                                                                                                                                                                                                                                                                                                                                                                                                                                                                                                                                                                                                                                                                                                                                                                                                                                                                                                                                                                                                                                                                                                                                                                                                                                                                                                                                                                                                                                                                                                                                                |                                                                                                                                                                                                                                                                                                                                                                                                                                                                                                                                                                                                                                                                                                                                                                                                                                                                                                                                                                                                                                                                                                         |

|                                                                                                                                                                                                                                                                                                                                                                                                                                                                                                                                                                                                                                                                                                                                                                                                            |                                                                                                                                                                                                                                                                                                                                                                                                                                                                                                                                                                                                                                                                                                                                                                                                                                                                                                                                                                                                                                                                                                                                                                                                                                                                |                                                                                                                                                                                                                                                                                                                                                                                                                                                                                                                                                                                                                                                                                                                                                                                                                                                                                                                                                                                                                                                                                                                                                                                                                                                                                                                                                                                                                             |
|------------------------------------------------------------------------------------------------------------------------------------------------------------------------------------------------------------------------------------------------------------------------------------------------------------------------------------------------------------------------------------------------------------------------------------------------------------------------------------------------------------------------------------------------------------------------------------------------------------------------------------------------------------------------------------------------------------------------------------------------------------------------------------------------------------|----------------------------------------------------------------------------------------------------------------------------------------------------------------------------------------------------------------------------------------------------------------------------------------------------------------------------------------------------------------------------------------------------------------------------------------------------------------------------------------------------------------------------------------------------------------------------------------------------------------------------------------------------------------------------------------------------------------------------------------------------------------------------------------------------------------------------------------------------------------------------------------------------------------------------------------------------------------------------------------------------------------------------------------------------------------------------------------------------------------------------------------------------------------------------------------------------------------------------------------------------------------|-----------------------------------------------------------------------------------------------------------------------------------------------------------------------------------------------------------------------------------------------------------------------------------------------------------------------------------------------------------------------------------------------------------------------------------------------------------------------------------------------------------------------------------------------------------------------------------------------------------------------------------------------------------------------------------------------------------------------------------------------------------------------------------------------------------------------------------------------------------------------------------------------------------------------------------------------------------------------------------------------------------------------------------------------------------------------------------------------------------------------------------------------------------------------------------------------------------------------------------------------------------------------------------------------------------------------------------------------------------------------------------------------------------------------------|
| <ul style="list-style-type: none"> <li>•unemployed</li> <li>•receivers of social benefits</li> <li>•citizens who are ill, disabled or unemployment</li> <li>•recipients of social welfare, students</li> <li>•Long-term unemployed, people with disabilities and immigrant women</li> <li>•recipients of care support</li> <li>•those on social welfare</li> <li>•those on sick leave</li> <li>•patients</li> <li>•people with low sick leave</li> <li>•those without work</li> <li>•unemployed</li> <li>•people outside the labor market</li> <li>•women</li> <li>•unemployed/people under 25 years</li> <li>•recipients of public welfare under 40 years</li> <li>•those without a job</li> <li>•families on social welfare</li> <li>•young social assistance recipients with ability to work</li> </ul> | <ul style="list-style-type: none"> <li>•public safety net</li> <li>•pay to work, lower tax on work income</li> <li>•none</li> <li>•more control</li> <li>•replace “kontantstøtte” and similar with basic welfare</li> <li>•rights, wage subsidies</li> <li>•equal right to welfare services</li> <li>•(duty to be in) activity</li> <li>•support</li> <li>•Use private health care</li> <li>•(more) demands when receiving social welfare</li> <li>•rewards</li> <li>•good welfare, education</li> <li>•education, individually adapted plan</li> <li>•preventive health care</li> <li>•wage subsidies</li> <li>•activities, duties</li> <li>•prioritised treatment</li> <li>•combine welfare and work</li> <li>•not granted with permanent disability benefits</li> <li>•decrease employment taxes and own taxes</li> <li>•more staff within welfare and schools</li> <li>•possible to receive 1500 SEK while working, for 6 months</li> <li>•insurance</li> <li>•help people back to work as soon as possible</li> <li>•disability benefits (sickness) should only be a last resort</li> <li>•national investment</li> <li>•contract law</li> <li>•freedom to choose treatment</li> <li>•decreasing compensation with the length of unemployment"</li> </ul> | <ul style="list-style-type: none"> <li>•pay to work</li> <li>•pay to have savings</li> <li>•become fully/partly self-sufficient</li> <li>•support</li> <li>•everyone should contribute</li> <li>•simplification of the system</li> <li>•work for all</li> <li>•Strengthen the families</li> <li>•live on own income</li> <li>•reduce sick leave</li> <li>•reduce line within health care</li> <li>•help to self-help</li> <li>•reduce sick leave</li> <li>•none</li> <li>•equal health supply for all</li> <li>•work for everyone, increased participation</li> <li>•more female scientists</li> <li>•none</li> <li>•work for all</li> <li>•back to work</li> <li>•labour market that includes all</li> <li>•more jobs</li> <li>•increased quality and access</li> <li>•reduce the proportion that goes on social security benefit by a quarter by 2015, then it shall be cut in half</li> <li>•reduce number of families on social welfare</li> <li>•duty to be in activity</li> <li>•pay to work, also those who receive social welfare</li> <li>•safety</li> <li>•increased patient safety</li> <li>•best care</li> <li>•better psychiatry</li> <li>•solidarity social insurance</li> <li>•laws that protect all</li> <li>•unemployment insurance should be a general and clear adjustment insurance</li> <li>•tax financed welfare, organised after individual need</li> <li>•economic safety if unemployed"</li> </ul> |
| <p><b>Self-employed workers</b></p> <ul style="list-style-type: none"> <li>•companies and self-employed</li> <li>•companies</li> <li>•entrepreneurs</li> <li>•immigrants, women</li> <li>•Women having businesses</li> </ul>                                                                                                                                                                                                                                                                                                                                                                                                                                                                                                                                                                               | <ul style="list-style-type: none"> <li>•lower taxes, easier legislation, education promoting self-employment)</li> <li>•social responsibility</li> <li>•equal right to welfare</li> <li>•right to welfare services</li> <li>•welfare rights</li> </ul>                                                                                                                                                                                                                                                                                                                                                                                                                                                                                                                                                                                                                                                                                                                                                                                                                                                                                                                                                                                                         | <ul style="list-style-type: none"> <li>•support</li> <li>•create economic growth</li> <li>•society governed with respect for nature</li> <li>•make it easier to be self-employed</li> <li>•Sweden should be a country for entrepreneurs</li> </ul>                                                                                                                                                                                                                                                                                                                                                                                                                                                                                                                                                                                                                                                                                                                                                                                                                                                                                                                                                                                                                                                                                                                                                                          |

|                                                                                                                                                                       |                                                                                                                                                                                                                                                                                                                    |                                                                                                                                                                                                                |
|-----------------------------------------------------------------------------------------------------------------------------------------------------------------------|--------------------------------------------------------------------------------------------------------------------------------------------------------------------------------------------------------------------------------------------------------------------------------------------------------------------|----------------------------------------------------------------------------------------------------------------------------------------------------------------------------------------------------------------|
|                                                                                                                                                                       | <ul style="list-style-type: none"> <li>•venture capital deduction, remove capital tax</li> <li>•decrease taxes, continue to focus on women's entrepreneurship</li> <li>•public counselling and financial support</li> <li>•none</li> <li>•less administration</li> <li>•less tax</li> <li>•tax systems"</li> </ul> | <ul style="list-style-type: none"> <li>•same freedom and freedom to choose as men</li> <li>•none</li> <li>•security</li> <li>•create more jobs</li> <li>•encourage innovation and entrepreneurship"</li> </ul> |
| <b>Rest category</b> <ul style="list-style-type: none"> <li>•users of public services</li> <li>•those without equity</li> <li>•Both sides in labour market</li> </ul> | <ul style="list-style-type: none"> <li>•public service consist of good basic services</li> <li>•higher taxes</li> </ul>                                                                                                                                                                                            | <ul style="list-style-type: none"> <li>•equality</li> <li>•reduce housing prices</li> <li>•flexible labour market</li> <li>•increased employment</li> </ul>                                                    |
